# Supplementary material for: Plasma Fatty Acids Pattern and Dry Eye Disease in the Elderly: The Montrachet Population-Based Study
Source: MDPI journal article supplement (doi:10.3390/nu14112290), 2022-05-30
Supplement: s1 [file s1]

**Table S1.**

Mean percentages of fatty acids by quartiles of fatty acids pattern scores (n = 740).

| Chemical structure | Common name                | Quartiles of FAs pattern scores |            |            |            | P-value |
|--------------------|----------------------------|---------------------------------|------------|------------|------------|---------|
|                    |                            | Q1                              | Q2         | Q3         | Q4         |         |
| SFAs               |                            |                                 |            |            |            |         |
| C12:0              | Lauric acid                | 0.1 (0.1)                       | 0.1 (0.1)  | 0.2 (0.1)  | 0.2 (0.1)  | <0.001  |
| C14:0              | Myristic acid              | 1.1 (0.3)                       | 1.1 (0.3)  | 1.2 (0.4)  | 1.2 (0.4)  | <0.001  |
| C15:0              | Pentadecanoic acid         | 0.3 (0.1)                       | 0.3 (0.1)  | 0.3 (0.1)  | 0.3 (0.1)  | <0.001  |
| C16:0              | Palmitic acid              | 21.7 (1.5)                      | 22.0 (1.6) | 22.3 (1.9) | 22.4 (1.8) | <0.001  |
| C17:0              | Margaric acid              | 0.3 (0.1)                       | 0.3 (0.1)  | 0.3 (0.1)  | 0.4 (0.1)  | <0.001  |
| C18:0              | Stearic acid               | 7.2 (0.6)                       | 7.0 (0.5)  | 6.8 (0.5)  | 6.6 (0.6)  | <0.001  |
| C20:0              | Arachidic acid             | 0.1 (0.1)                       | 0.1 (0.1)  | 0.1 (0.1)  | 0.2 (0.1)  | <0.001  |
| C22:0              | Behenic acid               | 0.2 (0.1)                       | 0.2 (0.1)  | 0.2 (0.1)  | 0.3 (0.1)  | <0.001  |
| MUFAs              |                            |                                 |            |            |            |         |
| C16:1 n-7          | Palmitoleic acid           | 2.2 (0.6)                       | 2.5 (0.7)  | 2.8 (0.7)  | 3.2 (1.0)  | <0.001  |
| C16:1 n-9          | Cis-7 hexadecenoic acid    | 0.4 (0.1)                       | 0.4 (0.1)  | 0.4 (0.1)  | 0.4 (0.1)  | <0.001  |
| C18:1 n-7          | Vaccenic acid              | 1.6 (0.2)                       | 1.8 (0.2)  | 1.8 (0.2)  | 2.1 (0.3)  | <0.001  |
| C18:1 n-9          | Oleic acid                 | 19.9 (2.1)                      | 21.2 (2.1) | 21.8 (2.1) | 22.5 (2.9) | <0.001  |
| C20:1 n-9          | Eicosenoic acid            | 0.2 (0.1)                       | 0.2 (0.1)  | 0.2 (0.1)  | 0.3 (0.1)  | <0.001  |
| C24:1 n-9          | Nervonic acid              | 0.3 (0.1)                       | 0.4 (0.1)  | 0.4 (0.2)  | 0.5 (0.2)  | <0.001  |
| PUFAs              |                            |                                 |            |            |            |         |
| Omega-6            |                            |                                 |            |            |            |         |
| C18:2 n-6          | Linoleic acid              | 27.4 (3.4)                      | 25.5 (3.1) | 24.4 (3.2) | 22.6 (3.8) | <0.001  |
| C18:3 n-6          | Gamma linoleic acid        | 0.5 (0.2)                       | 0.5 (0.2)  | 0.5 (0.2)  | 0.4 (0.1)  | 0.431   |
| C20:2 n-6          | Eicosadienoic acid         | 0.2 (0.1)                       | 0.2 (0.1)  | 0.2 (0.1)  | 0.3 (0.3)  | 0.002   |
| C20:3 n-6          | Dihomo-gamma-linoleic acid | 1.4 (0.3)                       | 1.5 (0.3)  | 1.6 (0.3)  | 1.6 (0.3)  | <0.001  |
| C20:4 n-6          | Arachidonic acid           | 7.6 (1.4)                       | 7.5 (1.4)  | 7.4 (1.4)  | 7.3 (1.6)  | 0.241   |
| C22:4 n-6          | Docosatetraenoic Acid      | 0.2 (0.1)                       | 0.2 (0.1)  | 0.3 (0.1)  | 0.3 (0.1)  | <0.001  |
| C22:5 n-6          | Docosapentaenoic n-6       | 0.1 (0.1)                       | 0.2 (0.1)  | 0.2 (0.1)  | 0.2 (0.1)  | <0.001  |
| Omega-3            |                            |                                 |            |            |            |         |
| C18:3 n-3          | Alpha linoleic acid        | 0.6 (0.2)                       | 0.6 (0.2)  | 0.6 (0.2)  | 0.6 (0.2)  | 0.412   |
| C20:5 n-3          | Eicosapentaenoic acid      | 1.5 (0.7)                       | 1.3 (0.6)  | 1.2 (0.5)  | 1.1 (0.5)  | <0.001  |
| C22:5 n-3          | Docosapentaenoic n-3       | 0.6 (0.1)                       | 0.6 (0.1)  | 0.6 (0.1)  | 0.6 (0.1)  | <0.001  |
| C22:6 n-3          | Docosahexaenoic acid       | 2.4 (0.6)                       | 2.2 (0.6)  | 2.2 (0.6)  | 2.2 (0.6)  | <0.001  |

SFAs = Saturated fatty acids; MUFAs = Monounsaturated fatty acids; PUFAs = Polyunsaturated

fatty acids Q1: first quartile, Q2: second quartile, Q3: third quartile, Q4: fourth quartile. The results are expressed as mean (SD = standard deviation) of total fatty acids.

Statistically significant *P*-values are in bold.

**Table S2.**

Demographics and lifestyle characteristics of study participants and fatty acids pattern scores distribution (n = 740).

|                                            | Quartiles of fatty acids pattern scores |              |              |              | <i>P</i> -trend |
|--------------------------------------------|-----------------------------------------|--------------|--------------|--------------|-----------------|
|                                            | Q1                                      | Q2           | Q3           | Q4           |                 |
| Age, y                                     | 81.8 (3.7)                              | 81.9 (3.5)   | 82.2 (3.5)   | 82.7 (3.9)   | 0.067           |
| Sex, female vs male                        | 127 (68.6)                              | 119 (64.3)   | 108 (58.4)   | 110 (59.5)   | <b>0.038</b>    |
| Body Mass Index (> 25 kg/m <sup>2</sup> )  | 78 (42.2)                               | 77 (41.6)    | 86 (46.5)    | 104 (56.2)   | <b>0.004</b>    |
| Smoking status, former and current smokers | 61 (33.5)                               | 52 (28.3)    | 73 (40.6)    | 75 (40.5)    | <b>0.035</b>    |
| Alcohol consumption, yes                   | 9 (5.3)                                 | 9 (5.2)      | 15 (9.3)     | 10 (6.2)     | 0.438           |
| Education level                            |                                         |              |              |              | 0.083           |
| No education or primary school             | 43 (23.3)                               | 60 (32.4)    | 55 (29.7)    | 54 (29.2)    | 0.172           |
| Short secondary school                     | 23 (12.4)                               | 15 (8.1)     | 26 (14.1)    | 33 (17.8)    |                 |
| Long secondary school                      | 40 (21.6)                               | 39 (21.1)    | 33 (17.8)    | 30 (16.3)    |                 |
| High school or university                  | 79 (42.7)                               | 71 (38.4)    | 71 (38.4)    | 68 (36.7)    |                 |
| Sun protection                             |                                         |              |              |              | 0.172           |
| Never                                      | 14 (7.6)                                | 25 (13.5)    | 16 (8.6)     | 28 (15.1)    |                 |
| Occasionally                               | 36 (19.6)                               | 34 (18.4)    | 52 (28.2)    | 33 (17.8)    |                 |
| Often                                      | 134 (72.8)                              | 126 (68.1)   | 117 (63.2)   | 124 (67.1)   |                 |
| Best-Corrected Visual Acuity, <20/60       | 2 (1.1)                                 | 6 (3.2)      | 4 (2.2)      | 6 (3.2)      | 0.339           |
| Central corneal thickness, µm              | 555.7 (3.3)                             | 554.2 (36.0) | 550.2 (31.8) | 556.2 (32.8) | 0.352           |
| Iris color                                 |                                         |              |              |              | 0.860           |
| Green/Brown                                | 73 (39.5)                               | 75 (40.5)    | 79 (42.7)    | 77 (41.6)    | 0.860           |
| Dark brown                                 | 64 (34.6)                               | 56 (30.3)    | 50 (27.0)    | 51 (27.6)    |                 |
| Blue                                       | 48 (25.9)                               | 54 (29.2)    | 56 (30.3)    | 57 (30.8)    |                 |
| Medical history <sup>a</sup>               |                                         |              |              |              |                 |
| Systemic hypertension                      | 99 (53.5)                               | 118 (63.8)   | 116 (62.7)   | 115 (62.2)   | 0.130           |
| Diabetes                                   | 17 (10.1)                               | 12 (6.9)     | 16 (9.9)     | 15 (9.4)     | 0.952           |
| Ocular history <sup>a</sup>                |                                         |              |              |              |                 |
| Age-related macular degeneration           | 2 (1.2)                                 | 9 (5.2)      | 6 (3.4)      | 11 (6.5)     | 0.037           |
| Diabetic retinopathy                       | 3 (1.6)                                 | 1 (0.5)      | 3 (1.6)      |              | 0.314           |
| Glaucoma                                   | 18 (9.7)                                | 25 (13.5)    | 19 (10.3)    | 25 (13.5)    | 0.475           |
| Ocular hypertension                        | 15 (8.1)                                | 13 (7.0)     | 9 (4.9)      | 10 (5.4)     | 0.226           |
| Cataract extraction                        | 88 (47.6)                               | 93 (50.3)    | 77 (41.6)    | 103 (55.7)   | 0.357           |
| Systemic drugs                             |                                         |              |              |              |                 |
| Antihypertensives                          | 91 (53.8)                               | 108 (62.4)   | 163 (63.6)   | 103 (63.6)   | 0.064           |
| Diuretics                                  | 19 (10.3)                               | 20 (10.8)    | 27 (14.5)    | 33 (17.8)    | <b>0.020</b>    |
| Beta-blockers                              | 31 (16.8)                               | 44 (23.8)    | 50 (27.0)    | 52 (28.1)    | <b>0.009</b>    |
| Calcium antagonists                        | 26 (14.0)                               | 30 (16.2)    | 30 (16.2)    | 18 (9.7)     | 0.255           |
| Anxiolytics                                | 19 (10.3)                               | 27 (14.6)    | 22 (11.9)    | 20 (10.9)    | 0.959           |

|                                        |           |           |           |           |                   |
|----------------------------------------|-----------|-----------|-----------|-----------|-------------------|
| Global psychotropic                    | 49 (26.5) | 48 (25.9) | 43 (23.2) | 44 (23.8) | 0.470             |
| Antihistamines                         | 7 (3.8)   | 12 (6.5)  | 4 (2.1)   | 14 (7.6)  | 0.367             |
| Decongestants and anti-allergic agents | 2 (1.1)   | 4 (2.2)   | 3 (1.6)   | 2 (1.1)   | 0.910             |
| Topical treatment,                     |           |           |           |           |                   |
| IOP lowering agents                    |           |           |           |           | 0.124             |
| Preserved eye drops                    | 12 (6.5)  | 17 (9.2)  | 12 (6.5)  | 21 (11.3) |                   |
| Unpreserved eye drops                  | 1 (0.5)   | 4 (2.2)   | 1 (0.5)   | 4 (2.2)   |                   |
| Antihistamine eye drops                | 9 (4.9)   | 13 (7.0)  | 9 (4.9)   | 11 (5.9)  | 0.943             |
| Other eye drops                        | 2 (1.1)   | 2 (1.1)   | 1 (0.5)   | 2 (1.1)   | 1.00              |
| Lipid-lowering drugs                   | 57 (33.7) | 68 (39.3) | 87 (53.7) | 79 (49.1) | <b>&lt;0.001</b>  |
| Plasma lipid, µg/ml                    |           |           |           |           |                   |
| Total cholesterol                      | 5.9 (1.0) | 5.8 (1.0) | 5.7 (1.0) | 5.7 (0.9) | 0.067             |
| LDL cholesterol                        | 3.7 (0.8) | 3.6 (0.9) | 3.6 (0.8) | 3.5 (0.8) | 0.198             |
| HDL cholesterol                        | 1.8 (0.4) | 1.7 (0.4) | 1.6 (0.4) | 1.6 (0.4) | <b>&lt;0.0001</b> |
| Triglycerides                          | 1.0 (0.4) | 1.1 (0.5) | 1.2 (0.5) | 1.2 (0.6) | <b>&lt;0.0001</b> |

Values are given as number (percentage) for categorical variables.

IOP = Intraocular pressure; LDL = Low density lipoprotein; HDL = High density lipoprotein

Q1= First quartile; Q2 = Second quartile; Q3 = Third quartile; Q4 = Fourth quartile.

Missing data for smoking (n = 4), alcohol (n = 75), sun protection (n = 1), central corneal thickness (n = 2), diabetes (n=76), age-related macular degeneration (n = 48), lipid-lowering drugs (n = 75), Antihypertensives (n = 75) and plasma lipids (n = 9).

<sup>a</sup> Self-reported. Statistically significant *P*-values are in bold.

**Table S3.**

Associations of plasma fatty acids and dry eye disease in the Montrachet Study.

| Chemical structure | Common name                | Dry Eye Disease         |                      |                         |                      |
|--------------------|----------------------------|-------------------------|----------------------|-------------------------|----------------------|
|                    |                            | OR (95%CI) <sup>a</sup> | P-trend <sup>b</sup> | OR (95%CI) <sup>c</sup> | P-trend <sup>d</sup> |
| SFAs               |                            |                         |                      |                         |                      |
| C18:0              | Stearic acid               |                         |                      |                         |                      |
|                    | Q1                         | 1.00 (reference)        | 0.165                | 1.00 (reference)        | 0.307                |
|                    | Q2                         | 0.70 (0.45-1.07)        |                      | 0.73 (0.46-1.16)        |                      |
|                    | Q3                         | 0.90 (0.59-1.36)        |                      | 0.98 (0.62-1.50)        |                      |
|                    | Q4                         | 0.65 (0.42-1.02)        |                      | 0.69 (0.43-1.11)        |                      |
| PUFAs              |                            |                         |                      |                         |                      |
| Omega-6            |                            |                         |                      |                         |                      |
| C18:3 n-6          | Gamma-linoleic Acid        |                         |                      |                         |                      |
|                    | Q1                         | 1.00 (reference)        | 0.366                | 1.00 (reference)        | 0.294                |
|                    | Q2                         | 0.95 (0.60-1.51)        |                      | 0.99 (0.61-1.60)        |                      |
|                    | Q3                         | 0.91 (0.61-1.37)        |                      | 0.88 (0.57-1.37)        |                      |
|                    | Q4                         | 0.82 (0.52-1.27)        |                      | 0.79 (0.49-1.27)        |                      |
| C20:3 n-6          | Dihomo-gamma-linoleic acid |                         |                      |                         |                      |
|                    | Q1                         | 1.00 (reference)        | 0.003                | 1.00 (reference)        | <b>0.002</b>         |
|                    | Q2                         | 0.84 (0.54-1.32)        |                      | 0.96 (0.60-1.55)        |                      |
|                    | Q3                         | 1.45 (0.93-2.24)        |                      | 1.62 (1.01-2.58)        |                      |
|                    | Q4                         | 1.70 (1.08-2.66)        |                      | 1.87 (1.16-3.01)        |                      |
| C20:4 n-6          | Arachidonic acid           |                         |                      |                         |                      |
|                    | Q1                         | 1.00 reference)         | 0.198                | 1.00 (reference)        | 0.282                |
|                    | Q2                         | 1.22 (0.80-1.87)        |                      | 1.28 (0.81-2.01)        |                      |
|                    | Q3                         | 1.03 (0.66-1.55)        |                      | 1.11 (0.70-1.74)        |                      |
|                    | Q4                         | 0.78 (0.51-1.22)        |                      | 0.79 (0.49-1.28)        |                      |
| C22:4 n-6          | Docosatetraenoic acid      |                         |                      |                         |                      |
|                    | Q1                         | 1.00 (reference)        | 0.181                | 1.00 (reference)        | 0.205                |
|                    | Q2                         | 1.48 (0.95-2.31)        |                      | 1.40 (0.87-2.24)        |                      |
|                    | Q3                         | 1.29 (0.83-2.01)        |                      | 1.22 (0.76-1.94)        |                      |
|                    | Q4                         | 1.48 (0.94-2.34)        |                      | 1.48 (0.91-4.42)        |                      |

| Chemical structure           | Common name                 | OR (95%CI) <sup>a</sup> | P-trend <sup>b</sup> | OR (95%CI) <sup>c</sup> | P-trend <sup>d</sup> |
|------------------------------|-----------------------------|-------------------------|----------------------|-------------------------|----------------------|
| C22:5 n-6                    | Docosapentaenoic acid (DPA) |                         |                      |                         |                      |
|                              | Q1                          | 1.00 (reference)        | 0.045                | 1.00 (reference)        | 0.053                |
|                              | Q2                          | 1.26 (0.78-2.02)        |                      | 1.47 (0.87-2.42)        |                      |
|                              | Q3                          | 1.59 (1.03-2.46)        |                      | 1.68 (1.06-2.66)        |                      |
|                              | Q4                          | 1.52 (0.93-2.46)        |                      | 1.60 (0.96-2.67)        |                      |
| Omega-3                      |                             |                         |                      |                         |                      |
| C20:5 n-3                    | Eicosapentaenoic Acid (EPA) |                         |                      |                         |                      |
|                              | Q1                          | 1.00 (reference)        | 0.289                | 1.00 (reference)        | 0.339                |
|                              | Q2                          | 0.71 (0.46-1.10)        |                      | 0.71 (0.45-1.12)        |                      |
|                              | Q3                          | 0.82 (0.54-1.25)        |                      | 0.84 (0.54-1.32)        |                      |
|                              | Q4                          | 0.75 (0.49-1.15)        |                      | 0.74 (0.47-1.18)        |                      |
| C22:5 n-3                    | Docosapentaenoic Acid (DPA) |                         |                      |                         |                      |
|                              | Q1                          | 1.00 (reference)        | 0.209                | 1.00 (reference)        | 0.185                |
|                              | Q2                          | 0.85 (0.54-1.37)        |                      | 0.83 (0.52-1.33)        |                      |
|                              | Q3                          | 1.09 (0.71-1.68)        |                      | 1.07 (0.68-1.68)        |                      |
|                              | Q4                          | 1.23 (0.79-1.92)        |                      | 1.27 (0.80-2.04)        |                      |
| Enzymatic activities indexes |                             |                         |                      |                         |                      |
| C20:4 n-6 to C20:3 n-6       | $\Delta$ 5 desaturase FADS1 |                         |                      |                         |                      |
|                              | Q1                          | 1.00 (reference)        | 0.048                | 1.00 (reference)        | <b>0.033</b>         |
|                              | Q2                          | 0.69 (0.45-1.05)        |                      | 0.67 (0.43-1.05)        |                      |
|                              | Q3                          | 0.68 (0.44-1.04)        |                      | 0.64 (0.41-0.99)        |                      |
|                              | Q4                          | 0.64 (0.42-0.98)        |                      | 0.61 (0.38-0.96)        |                      |
| C22:4 n-6 to C20:4 n-6       | ELOVL2/5                    |                         |                      |                         |                      |
|                              | Q1                          | 1.00 (reference)        | 0.013                | 1.00 (reference)        | <b>0.009</b>         |
|                              | Q2                          | 1.12 (0.72-1.73)        |                      | 1.15 (0.72-1.83)        |                      |
|                              | Q3                          | 0.91 (0.58-1.42)        |                      | 0.95 (0.59-1.52)        |                      |
|                              | Q4                          | 1.83 (1.20-2.80)        |                      | 2.02 (1.27-3.20)        |                      |
| C22:5 n-3 to C20:5 n-3       | ELOVL2/5                    |                         |                      |                         |                      |
|                              | Q1                          | 1.00 (reference)        | 0.045                | 1.00 (reference)        | 0.051                |
|                              | Q2                          | 0.93 (0.59-1.45)        |                      | 0.92 (0.57-1.47)        |                      |

|    |                  |                  |
|----|------------------|------------------|
| Q3 | 1.27 (0.82-1.96) | 1.33 (0.83-2.11) |
| Q4 | 1.43 (0.93-2.20) | 1.43 (0.90-2.27) |

SFAs = Saturated fatty acids; PUFAs = Polyunsaturated fatty acids; DGLA = Dihomo-gamma-linoleic acid; DTA = Docosatetraenoic acid; DPA = Docosapentaenoic acid; ELOVL2/5 = Elongation of very long chain fatty acids protein 2/5; DED = Dry Eye Disease; OR = Odds ratio; Q1 = First quartile; Q2 = Second quartile; Q3 = Third quartile; Q4 = Fourth quartile.

<sup>a</sup> Age and sex adjusted ORs.

<sup>b</sup> Adjusted ORs for age, sex, educational level, iris color, best-corrected visual acuity, age-related macular degeneration, systemic hypertension, antianxiolytics, antihistamine drop; lipid lowering drug use, Plasma HDL cholesterol and triglycerides.

<sup>c</sup> P-trend for logistic regression calculated by using median values within each category of FAs after adjustment for age and sex.

<sup>d</sup> P-trend for logistic regression calculated by using median values within each category of FAs after adjustment for age, sex, educational level, iris color, best-corrected visual acuity, age-related macular degeneration, systemic hypertension, antianxiolytics, antihistamine eye drops; lipid-lowering drugs, Plasma HDL cholesterol and triglycerides. Statistically significant *P*-values are in bold.
